## CORRECTION

## Correction: Protein kinase D activity controls endothelial nitric oxide synthesis (doi:10.1242/jcs.148601)

Clara Aicart-Ramos, Lucía Sánchez-Ruiloba, Mónica Gómez-Parrizas, Carlos Zaragoza, Teresa Iglesias and Ignacio Rodríguez-Crespo

This Correction updates and replaces the Expression of Concern (doi:10.1242/jcs.210005) relating to J. Cell Sci. (2014) **127**, 3360–3372.

Journal of Cell Science was made aware of issues with this paper by a reader. Bands in the top GFP control blot in Fig. 4B were duplicated from the PKD blot shown above. After discussion with the corresponding author, Ignacio Rodríguez-Crespo, the journal referred this matter to Universidad Complutense de Madrid (UCM). The UCM investigating committee reviewed replicate experiments to determine if they supported the scientific results and conclusions, and found that Dr Rodríguez-Crespo did not include incorrect or fabricated data. They concluded: "...we believe that the scientific results and conclusions generated by the four papers overall are solid and do not become qualitatively invalidated by this manipulation of images..."

The editorial policies of Journal of Cell Science state that: "Should an error appear in a published article that affects scientific meaning or author credibility but does not affect the overall results and conclusions of the paper, our policy is to publish a Correction..." and that a Retraction should be published when "...a published paper contain[s] one or more significant errors or inaccuracies that change the overall results and conclusions of the paper...". We follow the guidelines of the Committee on Publication Ethics (COPE), which state: "Retraction should usually be reserved for publications that are so seriously flawed (for whatever reason) that their findings or conclusions should not be relied upon". The standards of figure assembly and data presentation in this paper fall short of good scientific practice. However, given that the investigating committee at UCM decided that the conclusions of the paper were not affected by the errors, the appropriate course of action – according to COPE guidelines – is to publish a Correction.

The original data for the experiment shown in Fig. 4B were available and the correct figure panel is shown below.

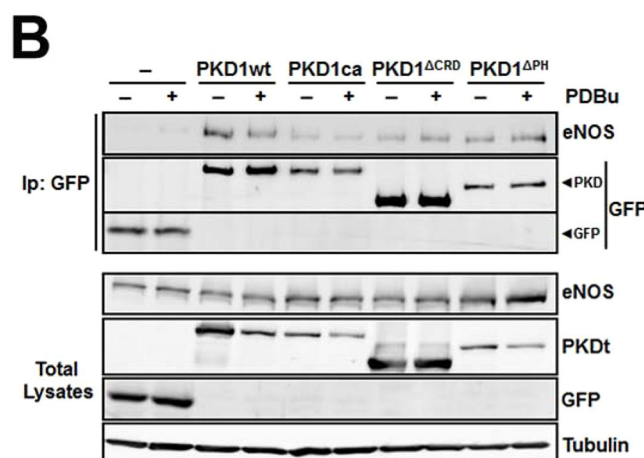

**Fig. 4. PKD1 or PKD2 and eNOS form a complex in transfected cells but phosphorylation on eNOS Ser1179 is not necessary for this association.** (B) HEK293T cells were cotransfected with either GFP vector alone (–), wild-type GFP–PKD1 (PKD1wt), constitutively active GFP–PKD1 (PKD1ca), or mutants lacking the PH domain (PKD1<sup>ΔPH</sup>) or the cysteine-rich domain (PKD1<sup>ΔCRD</sup>) together with full-length wild-type eNOS. At 24 h after transfection the medium was replaced with serum-free medium and 1 day later cells were treated (+) or not (–) with 1 μM PDBu for 15 min. Cell lysates were immunoprecipitated and analyzed together with total lysates as described for A.

The authors apologise to the journal and readers for this error.

Journal of Cell Science refers readers to other Corrections related to the UCM investigation:

doi:10.1242/jcs.219634

doi:10.1242/jcs.219667

doi:10.1242/jcs.219675
